# Supplementary material for: Therapeutic Targeting of Fumaryl Acetoacetate Hydrolase in Hereditary Tyrosinemia Type I
Source: PubMed Central journal article supplement (PMC7916972; doi:10.3390/ijms22041789), 2021-02-11
Supplement: ijms-22-01789-s001.pdf [file ijms-22-01789-s001.pdf]

Supplementary Material for:

## Therapeutic targeting of fumaryl acetoacetate hydrolase in hereditary tyrosinemia type I

Jon Gil-Martínez<sup>1,#</sup>, Iratxe Macías<sup>1,#</sup>, Luca Unione<sup>1,2</sup>, Ganeko Bernardo-Seisdedos<sup>2</sup>, Fernando Lopitz-Otsoa<sup>1</sup>, David Fernandez-Ramos<sup>1</sup>, Ana Laín<sup>1</sup>, Arantza Sanz-Parra<sup>1</sup>, José M Mato<sup>1</sup> and Oscar Millet<sup>1,2,\*</sup>

<sup>#</sup>Both authors equally contributed to the work.

<sup>1</sup>Precision Medicine and Metabolism Laboratory, CIC bioGUNE, Bizkaia Technology Park, Bld. 800, 48160 Derio, Bizkaia, Spain.

<sup>2</sup>ATLAS Molecular Pharma, Bizkaia Technology Park, Bld. 800, 48160 Derio, Bizkaia, Spain.

\*To whom correspondence should be addressed: Oscar Millet: Protein Stability and Inherited Disease Laboratory, CIC bioGUNE, Bizkaia Technology Park, Bld. 800, 48160 Derio, Bizkaia, Spain. Tel: (+34) 946 572 504; Fax: +34 946 572 502; [omillet@cicbiogune.es](mailto:omillet@cicbiogune.es)

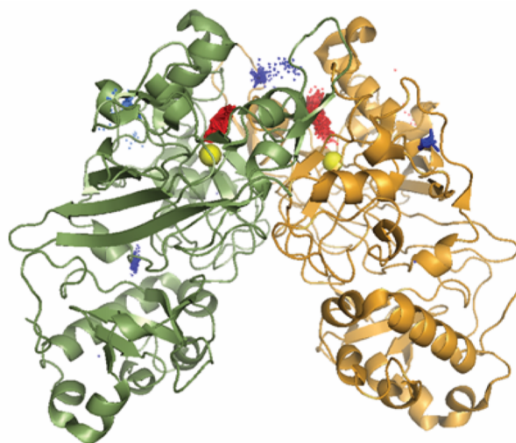

**Figure S1. Druggable binding sites.** Docking hits of a virtual screening of 20.000 compounds located in the dimeric structure of human FAH. Hits in and out of the active site are colored in red and blue respectively.

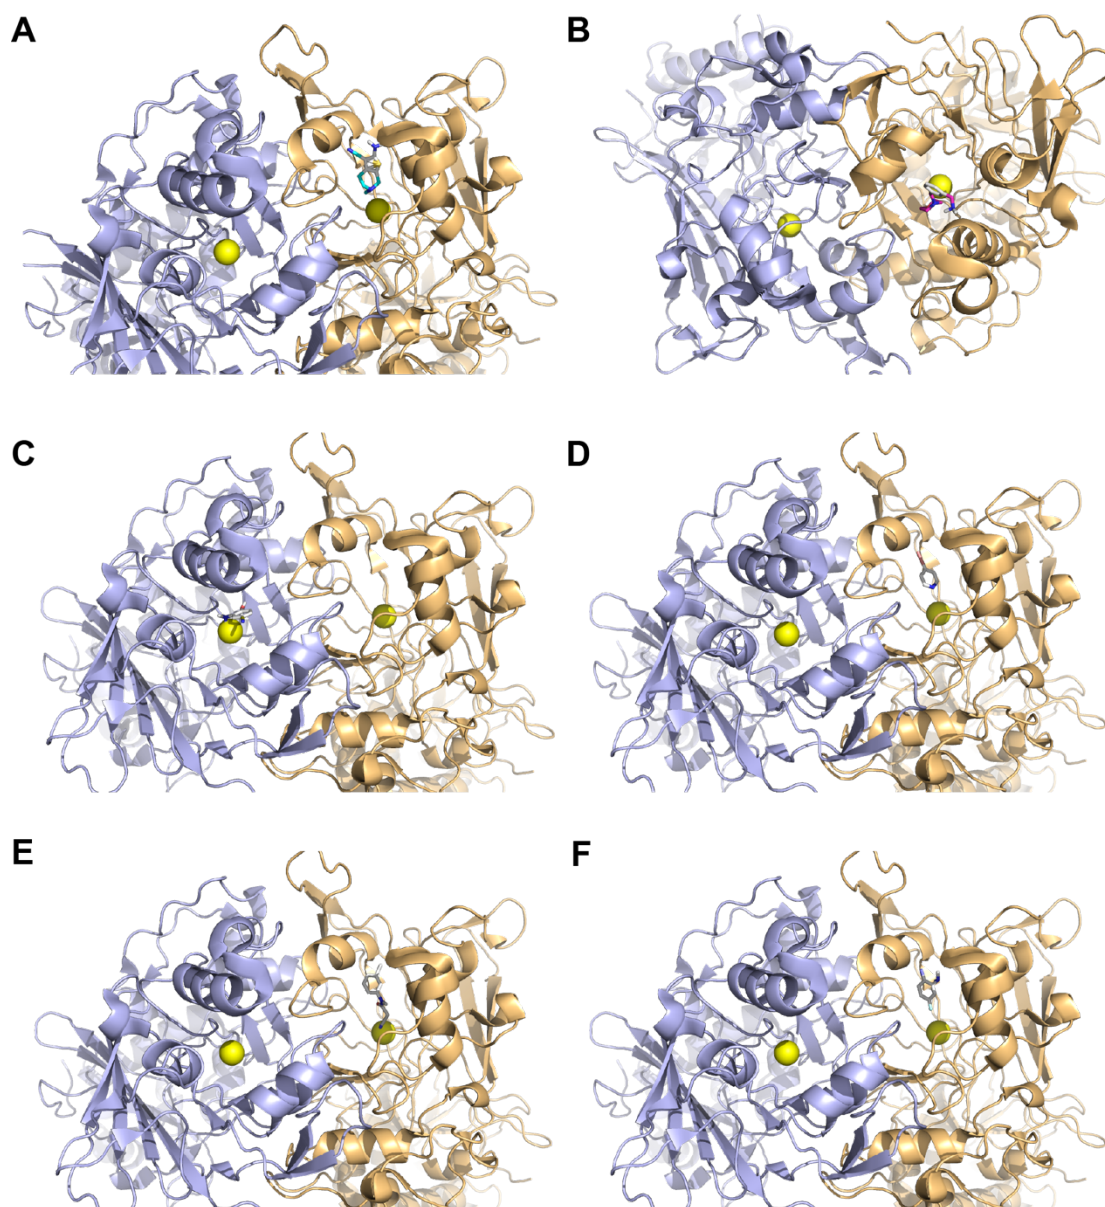

**Figure S2. Docking models for the set of compounds. A) 3E.11. B) 6A.11. C) 8H.11. D) 30B.10. E) 23A.11. F) 27H.4**

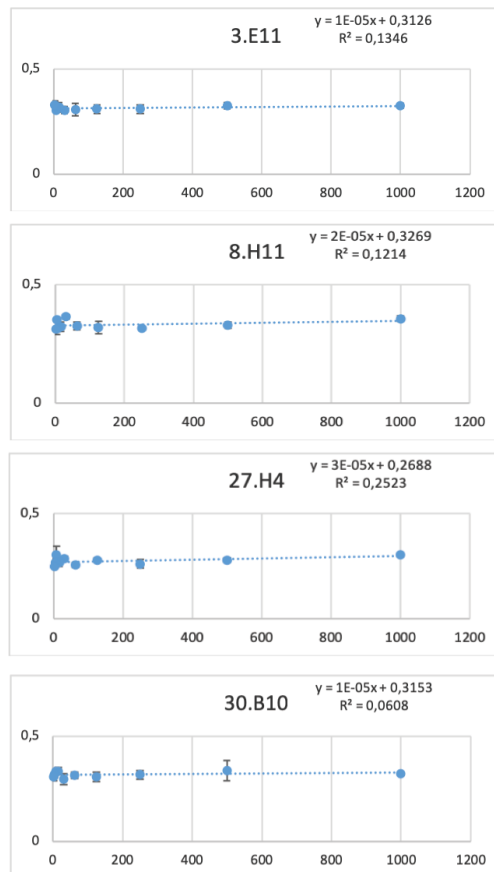

**Figure S3. Cell viability assays and IC<sub>50</sub> determination.** Cell viability assay for four representative chemicals determined in M1 cell lines, as indicated. Absorbance at 550 nm monitors the tetrazolium reaction in the mitochondria and is a reporter of cell viability.
